# Supplementary material
Source: MDPI journal article supplement (https://www.mdpi.com/2673-8007/2/1/18)
Supplement: s1 [file s1]

Supplementary Table S1. PMT mean values obtained for 8 *Mucor* spp. grown in 8 different media.

| Species                     | Strain code | Medium                       |                               |                                |                             |                              |                            |                             |                               |
|-----------------------------|-------------|------------------------------|-------------------------------|--------------------------------|-----------------------------|------------------------------|----------------------------|-----------------------------|-------------------------------|
|                             |             | BSF1                         | BSF2                          | BSF3                           | BSF4                        | BSF5                         | BSF6                       | BSF7                        | BSF8                          |
| <i>Mucor mucedo</i>         | MM1         | 3.51 ± 0.82 <sup>*a,AB</sup> | 3 ± 0.82 <sup>a,BC</sup>      | 2.17 ± 0.8 <sup>bcd,BCD</sup>  | 2 ± 1.17 <sup>a,BCD</sup>   | 4.67 ± 0.55 <sup>a,A</sup>   | 1.17 ± 1.37 <sup>b,D</sup> | 0.84 ± 0 <sup>a,D</sup>     | 1.5 ± 0 <sup>d,CD</sup>       |
| <i>Mucor plumbeus</i>       | MP1         | 3.34 ± 0.84 <sup>ab,A</sup>  | 3 ± 0.52 <sup>a,AB</sup>      | 3.67 ± 0.82 <sup>a,A</sup>     | 2 ± 0.41 <sup>a,BC</sup>    | 3.84 ± 0.52 <sup>abc,A</sup> | 3.33 ± 0.55 <sup>a,A</sup> | 1.01 ± 0.75 <sup>a,C</sup>  | 1.83 ± 0.52 <sup>bcd,C</sup>  |
| <i>Mucor mucedo</i>         | MM3         | 3.67 ± 0.98 <sup>a,A</sup>   | 2.84 ± 0.41 <sup>ab,ABC</sup> | 2 ± 0.89 <sup>cd,BCD</sup>     | 1.67 ± 0.55 <sup>a,CD</sup> | 3 ± 0.41 <sup>cd,AB</sup>    | 1 ± 0.75 <sup>b,D</sup>    | 1.17 ± 0.52 <sup>a,D</sup>  | 1.67 ± 0.41 <sup>cd,CD</sup>  |
| <i>Mucor lanceolatus</i>    | ML2         | 1.84 ± 0.63 <sup>bc,BC</sup> | 1.17 ± 1.38 <sup>c,CD</sup>   | 2.83 ± 0.41 <sup>abcd,AB</sup> | 1.5 ± 0.52 <sup>a,CD</sup>  | 3.67 ± 0.55 <sup>bc,A</sup>  | 1.5 ± 0.52 <sup>b,CD</sup> | 0.51 ± 0.52 <sup>ab,D</sup> | 1.83 ± 0.52 <sup>bcd,BC</sup> |
| <i>Mucor circinelloides</i> | MC3         | 1.67 ± 0.98 <sup>c,BC</sup>  | 1 ± 0.52 <sup>c,C</sup>       | 1.67 ± 0.52 <sup>d,BC</sup>    | 1.67 ± 0.55 <sup>a,BC</sup> | 3.84 ± 0.52 <sup>abc,A</sup> | 0.83 ± 0.63 <sup>b,C</sup> | 0 ± 0.55 <sup>c,D</sup>     | 2.5 ± 0 <sup>ab,B</sup>       |
| <i>Mucor circinelloides</i> | MC1         | 3.84 ± 0.89 <sup>a,A</sup>   | 1.84 ± 0.41 <sup>abc,BC</sup> | 2.67 ± 0.52 <sup>abcd,B</sup>  | 1.67 ± 0.55 <sup>a,C</sup>  | 4.17 ± 0 <sup>ab,A</sup>     | 0.5 ± 0.52 <sup>b,D</sup>  | 0 ± 0.41 <sup>bc,D</sup>    | 1.5 ± 0 <sup>d,C</sup>        |
| <i>Mucor spinosus</i>       | MS1         | 1.67 ± 0.98 <sup>c,BC</sup>  | 1.5 ± 0.75 <sup>c,BC</sup>    | 3.33 ± 0.82 <sup>ab,A</sup>    | 1.5 ± 0.82 <sup>a,BC</sup>  | 2.5 ± 0.52 <sup>d,AB</sup>   | 1.5 ± 0.52 <sup>b,BC</sup> | 0.51 ± 0.52 <sup>ab,C</sup> | 2.67 ± 0.75 <sup>a,AB</sup>   |
| <i>Mucor racemosus</i>      | MR3         | 1.5 ± 0.52 <sup>c,B</sup>    | 1.67 ± 0 <sup>bc,B</sup>      | 3 ± 0.63 <sup>abc,A</sup>      | 1.34 ± 0.41 <sup>a,B</sup>  | 3.17 ± 0.63 <sup>cd,A</sup>  | 1.33 ± 1.52 <sup>b,B</sup> | 1.34 ± 0.55 <sup>a,B</sup>  | 2.33 ± 0.41 <sup>abc,AB</sup> |

<sup>\*</sup>, Strain effect on PMT values for each medium: values with different letters (small letters a, b, c and d) in a column are significantly different by Tukey's HSD test (P<0.05); Medium effect on PMT values for each strain: values with different letters (capital letters A, B, C and D) in a column are significantly different by Tukey's HSD test (P<0.05).

Supplementary Table S2. OST mean values obtained for 8 *Mucor* spp. grown in 8 different media.

| Species                     | Strain code | Medium                       |                              |                              |                             |                            |                              |                              |                             |
|-----------------------------|-------------|------------------------------|------------------------------|------------------------------|-----------------------------|----------------------------|------------------------------|------------------------------|-----------------------------|
|                             |             | BSF1                         | BSF2                         | BSF3                         | BSF4                        | BSF5                       | BSF6                         | BSF7                         | BSF8                        |
| <i>Mucor mucedo</i>         | MM1         | 7.17 ± 0.58 <sup>a,AB</sup>  | 5.67 ± 1.59 <sup>ab,BC</sup> | 5.33 ± 0.76 <sup>ab,BC</sup> | 7.33 ± 0.29 <sup>a,AB</sup> | 8.1 ± 0.36 <sup>a,A</sup>  | 0.7 ± 0.52 <sup>c,D</sup>    | 3.67 ± 0.29 <sup>bc,C</sup>  | 4.5 ± 0.5 <sup>ab,C</sup>   |
| <i>Mucor plumbeus</i>       | MP1         | 7.87 ± 0.12 <sup>a,A</sup>   | 7.67 ± 0.29 <sup>a,AB</sup>  | 4.2 ± 0.61 <sup>bcd,D</sup>  | 7.33 ± 0.29 <sup>a,AB</sup> | 7 ± 0.5 <sup>a,ABC</sup>   | 6.83 ± 0.76 <sup>a,ABC</sup> | 5.83 ± 0.76 <sup>a,C</sup>   | 6.33 ± 0.29 <sup>a,BC</sup> |
| <i>Mucor mucedo</i>         | MM3         | 8.33 ± 0.29 <sup>a,A</sup>   | 4.47 ± 0.42 <sup>bc,C</sup>  | 5.83 ± 0.58 <sup>a,BC</sup>  | 7.33 ± 0.29 <sup>a,AB</sup> | 7.83 ± 0.29 <sup>a,A</sup> | 1.5 ± 0.5 <sup>bc,D</sup>    | 2 ± 0.5 <sup>c,D</sup>       | 2.67 ± 1.26 <sup>bc,D</sup> |
| <i>Mucor lanceolatus</i>    | ML2         | 1.33 ± 1.26 <sup>bc,CD</sup> | 3.83 ± 0.15 <sup>bc,B</sup>  | 1.33 ± 0.29 <sup>e,CD</sup>  | 7.03 ± 0.4 <sup>ab,A</sup>  | 7 ± 0 <sup>a,A</sup>       | 0 ± 0 <sup>c,D</sup>         | 1.67 ± 0.58 <sup>c,C</sup>   | 1.5 ± 0.5 <sup>cd,CD</sup>  |
| <i>Mucor circinelloides</i> | MC3         | 3.5 ± 0.5 <sup>b,BC</sup>    | 0.53 ± 0.92 <sup>d,D</sup>   | 3.17 ± 0.29 <sup>d,BC</sup>  | 7.07 ± 0.12 <sup>ab,A</sup> | 7.33 ± 0.29 <sup>a,A</sup> | 2.67 ± 0.29 <sup>b,C</sup>   | 4.5 ± 1.32 <sup>ab,B</sup>   | 0.67 ± 0.29 <sup>d,D</sup>  |
| <i>Mucor circinelloides</i> | MC1         | 8.17 ± 0.58 <sup>a,A</sup>   | 3.27 ± 0.64 <sup>c,B</sup>   | 3.5 ± 0.5 <sup>cd,B</sup>    | 7.17 ± 0.29 <sup>ab,A</sup> | 8 ± 0.5 <sup>a,A</sup>     | 0 ± 0 <sup>c,C</sup>         | 3 ± 1 <sup>bc,B</sup>        | 3.17 ± 1.04 <sup>bc,B</sup> |
| <i>Mucor spinosus</i>       | MS1         | 1.7 ± 0.66 <sup>bc,CD</sup>  | 1.23 ± 0.25 <sup>d,CD</sup>  | 0.5 ± 0.5 <sup>e,D</sup>     | 6.53 ± 0.15 <sup>b,A</sup>  | 4.17 ± 0.58 <sup>b,B</sup> | 2.67 ± 1.53 <sup>b,BC</sup>  | 2.17 ± 0.58 <sup>c,BCD</sup> | 3 ± 0.5 <sup>bc,BC</sup>    |
| <i>Mucor racemosus</i>      | MR3         | 0.83 ± 1.44 <sup>c,D</sup>   | 4.63 ± 0.06 <sup>bc,BC</sup> | 4.83 ± 0.58 <sup>abc,B</sup> | 6.67 ± 0.29 <sup>ab,A</sup> | 7.1 ± 0.36 <sup>a,A</sup>  | 0.33 ± 0.29 <sup>c,D</sup>   | 3 ± 0.5 <sup>bc,C</sup>      | 5.67 ± 0.58 <sup>a,AB</sup> |

\*, Strain effect on OST values for each medium: values with different letters (small letters a, b, c, d and e) in a column are significantly different by Tukey's HSD test (P<0.05); Medium effect on OST values for each strain: values with different letters (capital letters A, B, C and D) in a column are significantly different by Tukey's HSD test (P<0.05).
